# Supplementary material for: Effects of domestication on the gut microbiota parallel those of human industrialization
Source: eLife. 2021 Mar 23;10:e60197. doi: 10.7554/eLife.60197 (PMC7987347; doi:10.7554/eLife.60197)
Supplement: Supplementary file 1. [file elife-60197-supp1.xlsx]

## Sheet: Sheet1
Supplementary File 1: Beta-diversity and NMDS shift analyses were generally robust to the distance metric used and to subsetting the dataset.
WHOLE DATASET						SUBSET: Truly wild only						SUBSET: Perfect pairs only						SUBSET: Dyads
Variable	Distance metric	Analysis	P	R2		Variable	Distance metric	Analysis	P	R2		Variable	Distance metric	Analysis	P	R2		Variable	Distance metric	Analysis	P	R2
Host dyad	Bray-Curtis	PERMANOVA	<0.001	0.38567		Host dyad	Bray-Curtis	PERMANOVA	<0.001	0.37373		Host dyad	Bray-Curtis	PERMANOVA	<0.001	0.357		Alpaca domestication status	Bray-Curtis	PERMANOVA	0.004	0.27845
	Weighted UniFrac	PERMANOVA	<0.001	0.47683			Weighted UniFrac	PERMANOVA	<0.001	0.39019			Weighted UniFrac	PERMANOVA	<0.001	0.4805		Alpaca shift	Bray-Curtis	Mann-Whitney U	0.045	n/a
	Unweighted UniFrac	PERMANOVA	<0.001	0.43212			Unweighted UniFrac	PERMANOVA	<0.001	0.35856			Unweighted UniFrac	PERMANOVA	<0.001	0.4022		Cow domestication status	Bray-Curtis	PERMANOVA	0.001	0.30968
Status	Bray-Curtis	PERMANOVA	<0.001	0.15441		Status	Bray-Curtis	PERMANOVA	<0.001	0.17044		Status	Bray-Curtis	PERMANOVA	<0.001	0.1567		Cow shift	Bray-Curtis	Mann-Whitney U	<0.001	n/a
	Weighted UniFrac	PERMANOVA	<0.001	0.17476			Weighted UniFrac	PERMANOVA	<0.001	0.16049			Weighted UniFrac	PERMANOVA	<0.001	0.14731		Dog domestication status	Bray-Curtis	PERMANOVA	0.829
	Unweighted UniFrac	PERMANOVA	<0.001	0.12945			Unweighted UniFrac	PERMANOVA	<0.001	0.11138			Unweighted UniFrac	PERMANOVA	<0.001	0.1339		Dog shift	Bray-Curtis	Mann-Whitney U	0.47	n/a
Diet	Bray-Curtis	PERMANOVA	<0.001	0.09721		Shift NMDS axis 1	Bray-Curtis	Mann-Whitney U	0.01242	n/a		Shift NMDS axis 1	Bray-Curtis	Mann-Whitney U	0.1338	n/a		Guinea pig domestication status	Bray-Curtis	PERMANOVA	0.001	0.24261
	Weighted UniFrac	PERMANOVA	<0.001	0.13914			Weighted UniFrac	Mann-Whitney U	<0.001	n/a			Weighted UniFrac	Mann-Whitney U	0.008715	n/a		Guinea pig shift	Bray-Curtis	Mann-Whitney U	0.35	n/a
	Unweighted UniFrac	PERMANOVA	<0.001	0.11025			Unweighted UniFrac	Mann-Whitney U	<0.001	n/a			Unweighted UniFrac	Mann-Whitney U	0.008715	n/a		Mouse domestication status	Bray-Curtis	PERMANOVA	0.001	0.40513
Physiology	Bray-Curtis	PERMANOVA	<0.001	0.12945														Mouse shift	Bray-Curtis	Mann-Whitney U	0.73	n/a
	Weighted UniFrac	PERMANOVA	<0.001	0.12952														Pig domestication status	Bray-Curtis	PERMANOVA	0.001	0.25
	Unweighted UniFrac	PERMANOVA	<0.001	0.15887														Pig shift	Bray-Curtis	Mann-Whitney U	0.043	n/a
Captivity	Bray-Curtis	PERMANOVA	<0.001	0.3932														Rat domestication status	Bray-Curtis	PERMANOVA	0.002	0.25765
	Weighted UniFrac	PERMANOVA	<0.001	0.04679														Rat shift	Bray-Curtis	Mann-Whitney U	0.011	n/a
	Unweighted UniFrac	PERMANOVA	<0.001	0.3708														Rabbit domestication status	Bray-Curtis	PERMANOVA	0.001	0.17898
Shift NMDS axis 1	Bray-Curtis	Mann-Whitney U	0.005983	n/a														Rabbit shift	Bray-Curtis	Mann-Whitney U	0.051	n/a
	Weighted UniFrac	Mann-Whitney U	0.003024	n/a														Sheep domestication status	Bray-Curtis	PERMANOVA	0.001	0.17687
	Unweighted UniFrac	Mann-Whitney U	0.003768	n/a														Sheep shift	Bray-Curtis	Mann-Whitney U	<0.001	n/a
