# Supplementary material for: Effects of domestication on the gut microbiota parallel those of human industrialization
Source: eLife. 2021 Mar 23;10:e60197. doi: 10.7554/eLife.60197 (PMC7987347; doi:10.7554/eLife.60197)
Supplement: Supplementary file 2. [file elife-60197-supp2.xlsx]

## Sheet: Sheet1
Supplementary File 2: Expanded sampling metadata.
Common name	Species	Status	Type	N	Gut physiology	Diet	Proportion of Reads Mapped	Time since divergence (years)	Time since domestication (years)	Samples from captive population	Wild samples from wild population (e.g. "truly wild")	True progenitor-domesticate pairing (e.g. "perfect pair")	Sampling location
Cattle	Bos taurus	Domesticated	Agricultural	9	Ruminant	Herbivore	0.64 ± 0.13	4880000	9000	yes			Vermont
Bison	Bison bison	Wild		20	Ruminant	Herbivore	0.80 ± 0.11				yes		Canada
Sheep	Ovis aries	Domesticated	Agricultural	13	Ruminant	Herbivore	0.57 ± 0.04	3140000	12000	yes			Vermont & Massachusetts (1)
Bighorn sheep	Ovis canadensis	Wild		10	Ruminant	Herbivore	0.64 ± 0.07				yes		Wyoming
Pig	Sus scrofa	Domesticated	Agricultural	9	Simple	Omnivore	0.66 ± 0.11	10500	10500	yes			Vermont
Boar	Sus scrofa	Wild		16	Simple	Omnivore	0.61 ±0.06				yes	yes	Alabama
Alpaca	Vicugna pacos	Domesticated	Agricultural	8	Ruminant	Herbivore	0.62 ± 0.03	4480000	6000	yes			Massachusetts (1)
Vicuña	Vicugna vicugna	Wild		5	Ruminant	Herbivore	0.58 ± 0.02			yes		yes	Chile
Dog	Canis familiaris	Domesticated	Companion	7	Simple	Carnivore	0.13 ± 0.13	17000	17000	yes			Minesotta
Wolf	Canis lupus	Wild		9	Simple	Carnivore	0.11 ± 0.11			yes		yes	Minesotta
Rabbit	Oryctolagus cuniculus	Domesticated	Companion	11	Hindgut fermenter	Herbivore	0.50 ± 0.12	2000	2000	yes			Massachusetts (2)
European rabbit	Oryctolagus cuniculus	Wild		12	Hindgut fermenter	Herbivore	0.36 ± 0.04				yes	yes	Portugal
Guinea pig	Cavia porcellus	Domesticated	Laboratory	10	Hindgut fermenter	Herbivore	0.45 ± 0.05	5400000	7000	yes			Massachusetts (3)
Guinea pig	Cavia tschudii	Wild		11	Hindgut fermenter	Herbivore	0.42 ± 0.27			yes		yes	Peru
Mouse	Mus musculus	Domesticated	Laboratory	9	Hindgut fermenter	Omnivore	0.79 ± 0.15	12000	12000	yes			Massachusetts (3)
Mouse	Mus musculus	Wild		9	Hindgut fermenter	Omnivore	0.79 ± 0.15				yes	yes	Massachusetts (4)
Rat	Rattus norvegicus	Domesticated	Laboratory	6	Hindgut fermenter	Omnivore	0.74 ± 0.09	5500	5500	yes			Massachusetts (3)
Norway rat	Rattus norvegicus	Wild		10	Hindgut fermenter	Omnivore	0.87 ± 0.07				yes	yes	New York
