# Supplementary material for: Effects of domestication on the gut microbiota parallel those of human industrialization
Source: eLife. 2021 Mar 23;10:e60197. doi: 10.7554/eLife.60197 (PMC7987347; doi:10.7554/eLife.60197)
Supplement: Supplementary file 3. [file elife-60197-supp3.xlsx]

## Sheet: Sheet1
Supplementary File 3: Nutritional information for experimental diets.
	Mouse				Dog
	Wild diet			Domestic diet	Wild diet	Domestic diet
	Mealworms (5% by weight)	Birdseed (95%)	Mix	Prolab Isopro RMH 3000	Raw chicken	Nutrisource Lamb Meal and Peas Grain Free Diet
Crude Protein (min)	50	9	11.05	22	14.1	28.69
Crude Fat (min	24	4	5	5	28.7	18.25
Crude Fiber (max)	9.5	15	14.725	5	0	3.69
Phosphorus (min)	0.5			0.8	0.77	1.16
Moisture (max)	10	13	12.85	10		9.5
Calories/gram			5143	4136	3190	4088
